# Supplementary material for: Distinct metabolic states guide maturation of inflammatory and tolerogenic dendritic cells
Source: PubMed Central journal article supplement (PMC9440236; doi:10.1038/s41467-022-32849-1), 2022-09-02
Supplement: 41467_2022_32849_MOESM1_ESM.pdf [file 41467_2022_32849_MOESM1_ESM.pdf]

A

## Gating strategy for mono vs mDC

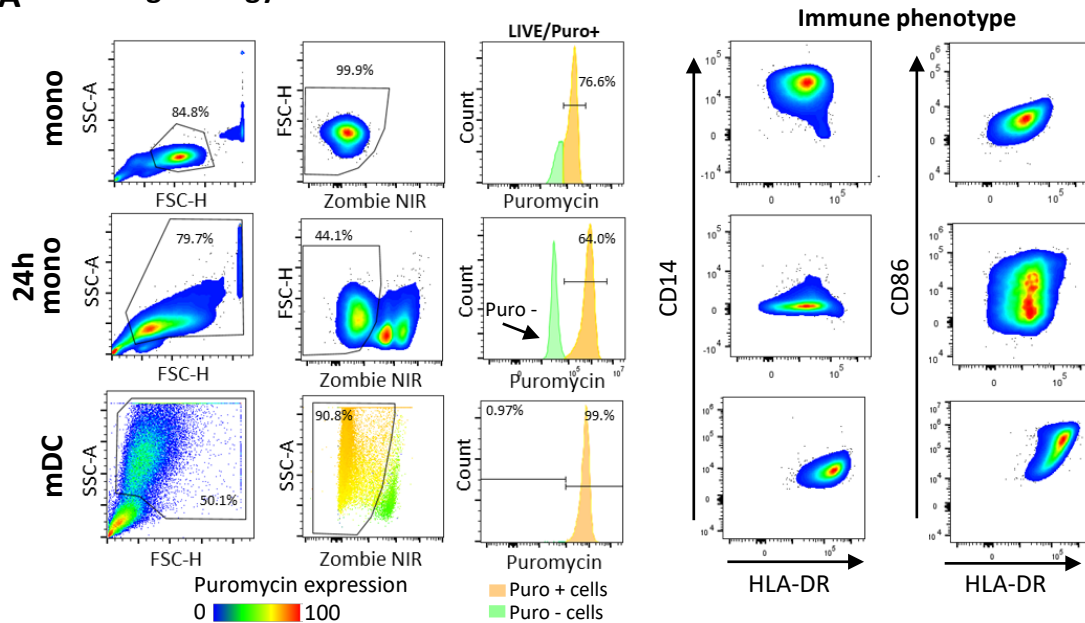

B

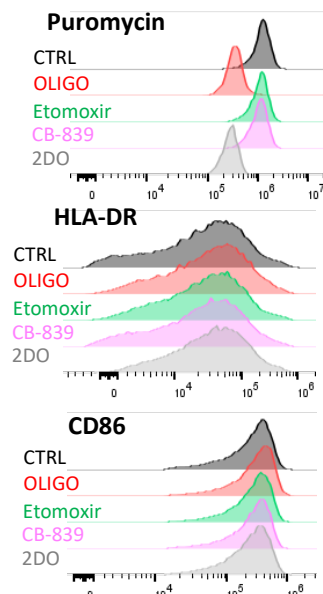

C

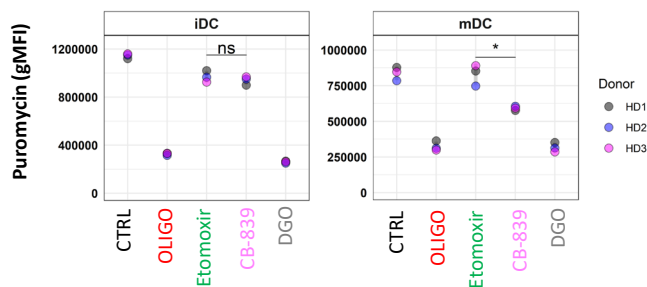

D

## PBMC Gating Strategy

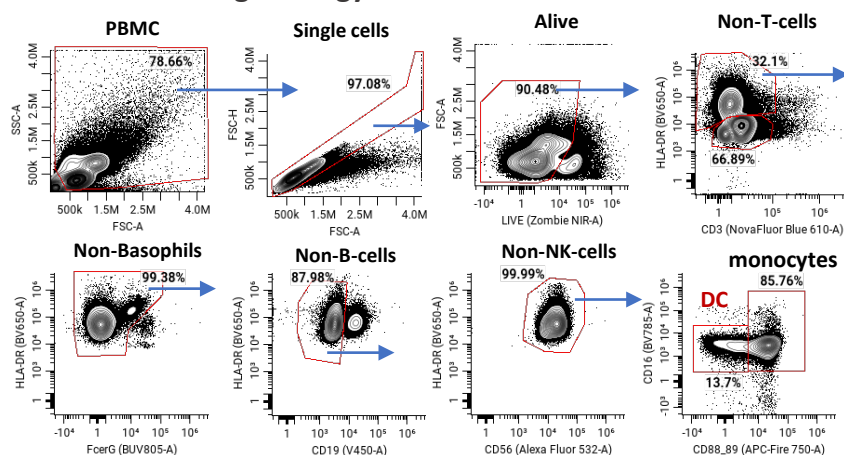

**Supplementary Figure 1. Gating strategies and metabolic inhibitor effects on puromycin expression.** (A) Gating strategies used to determine CD14<sup>+</sup> HLA-DR-CD86<sup>-</sup> monocyte (top), 24h post-GM-CSF/IL4 stimulus CD14<sup>+</sup> HLA-DR<sup>Lo</sup> CD86<sup>Lo</sup> precursor (middle) and mDC CD14-HLA-DR<sup>+</sup>CD86<sup>+</sup> populations (bottom). Puromycin<sup>+</sup> populations (yellow peaks) were selected for downstream analyses. (B) Flow cytometry histograms for Puromycin, HLA-DR and CD86 expression changes in control DC treated with indicated metabolic inhibitors. (C) Bar graphs with mean±SE represent gMFI of Puromycin expression changes in control and metabolic inhibitor samples (bar graphs represent 3 independent replicates from 1 donor). Statistical significance was calculated using two-sided Student's t-test. (D) Gating strategies for immune characterization of freshly isolated blood monocytes and DC populations. Representative contour plots for 1 donor (out of N = 3) are shown.

## scMEP immune markers

A

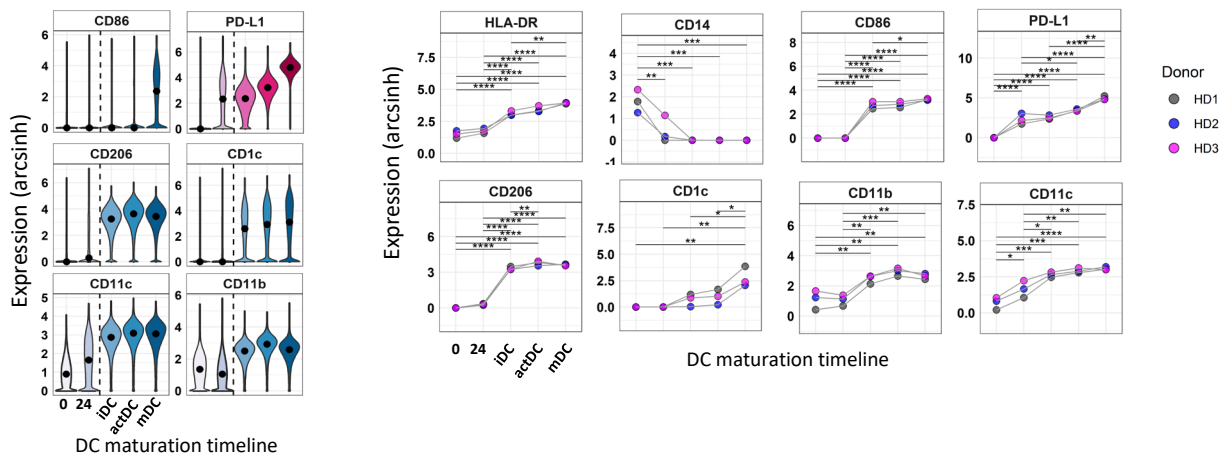

B

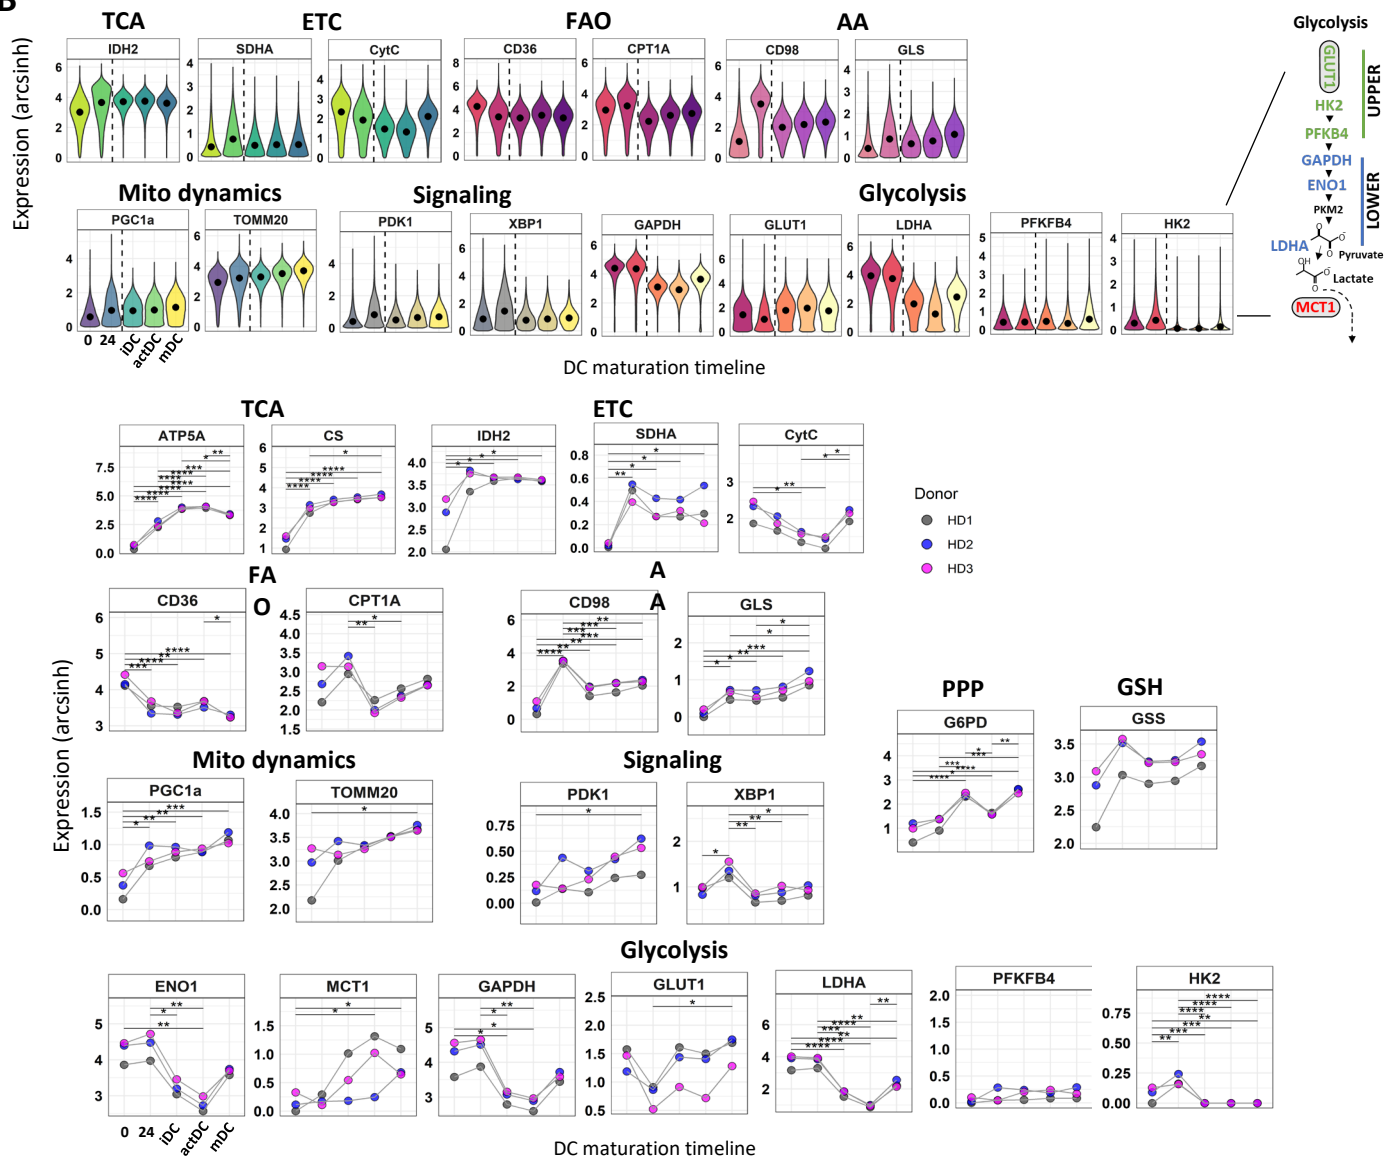

**Supplementary Figure 2.** Expression of scMEP metabolic markers and single cell scores across differentiation DC timeline. Shown are (arcsinh transformed) expression values for (A) scMEP immune markers and (B) scMEP metabolic markers across DC differentiation states. Black dots represent population medians and the dotted line separates early precursors from iDC, actDC, and mDC stages. Violin plots are representative of 1 donor (out of N = 3). Dot plots on right represent median scMEP marker expression values for 3 donors with denoted statistical significance, calculated using one-way ANOVA with Tukey's *post-hoc* test.

A

## Protein synthesis-normalized SCENITH

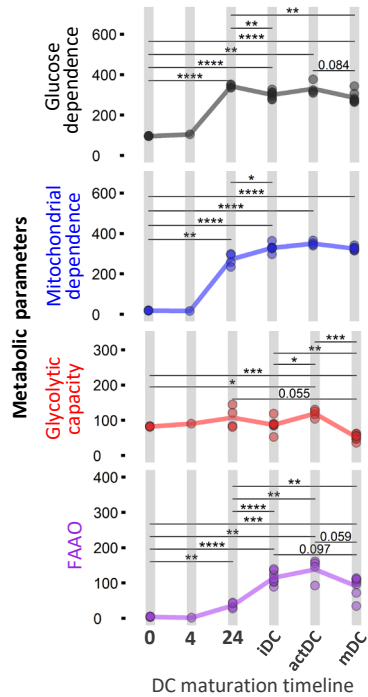

B

## scMEP pathway score profiles

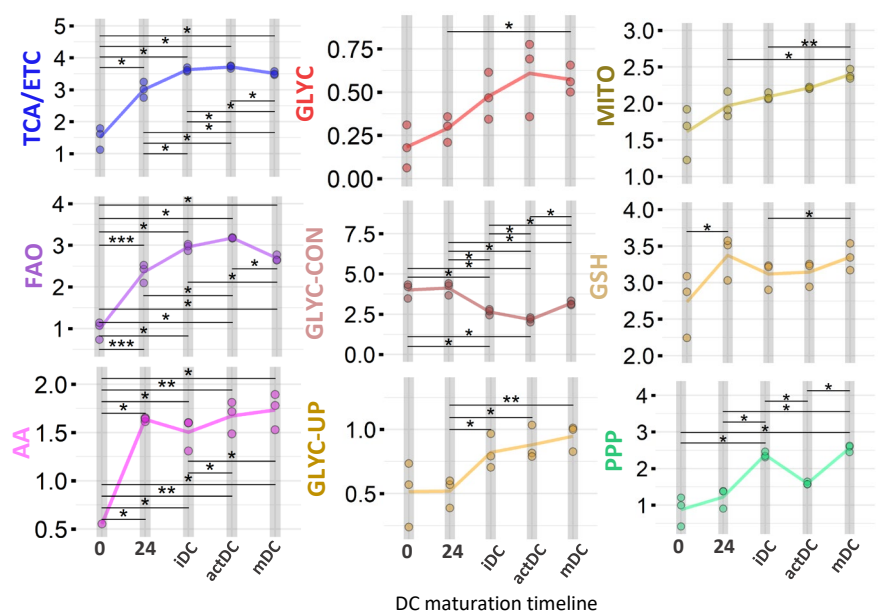

C

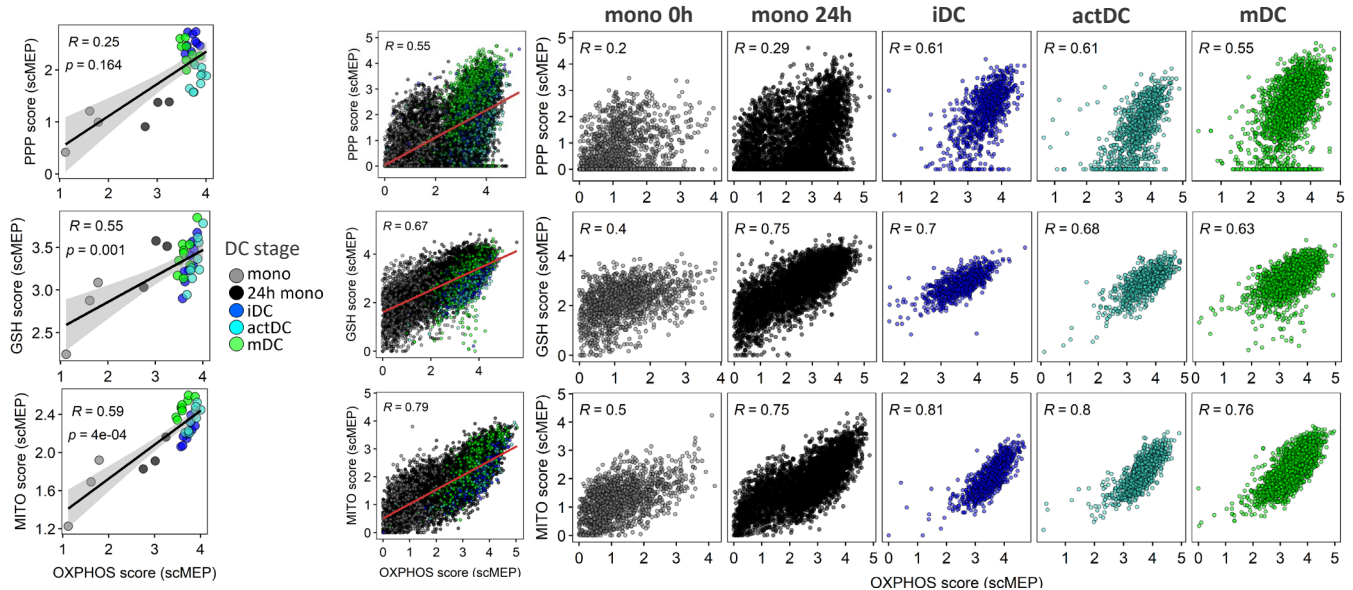

**Supplementary Figure 3 Associations between single-cell scMEP metabolic pathway scores and immune phenotypes of DC differentiation stages.** (A) Overview of kinetic changes in protein synthesis-adjusted percentual SCENITH parameters and (B) scMEP metabolic scores across DC differentiation timeline with indicated significance for pairwise statistical comparisons. Lines represent average SCENITH profiles (precursor stages represent 3 independent donors, iDC, actDC, and mDC represent 6 independent donors). scMEP samples are representative of 3 individual donors. (A, B) Statistical Significance was calculated using one-way ANOVA with Tukey's *post-hoc* test. (C) Correlations between median SCENITH parameters and respective calculated median scMEP pathway scores with Spearman correlation coefficient (R), p-value and grey shading denoting 95% confidence interval (CI). Middle and multi-panel graphs depict single-cell scMEP scores for combined and individual DC sample time points respectively. Subsampled single-cell data points for the individual donor (out of N = 3) are shown.

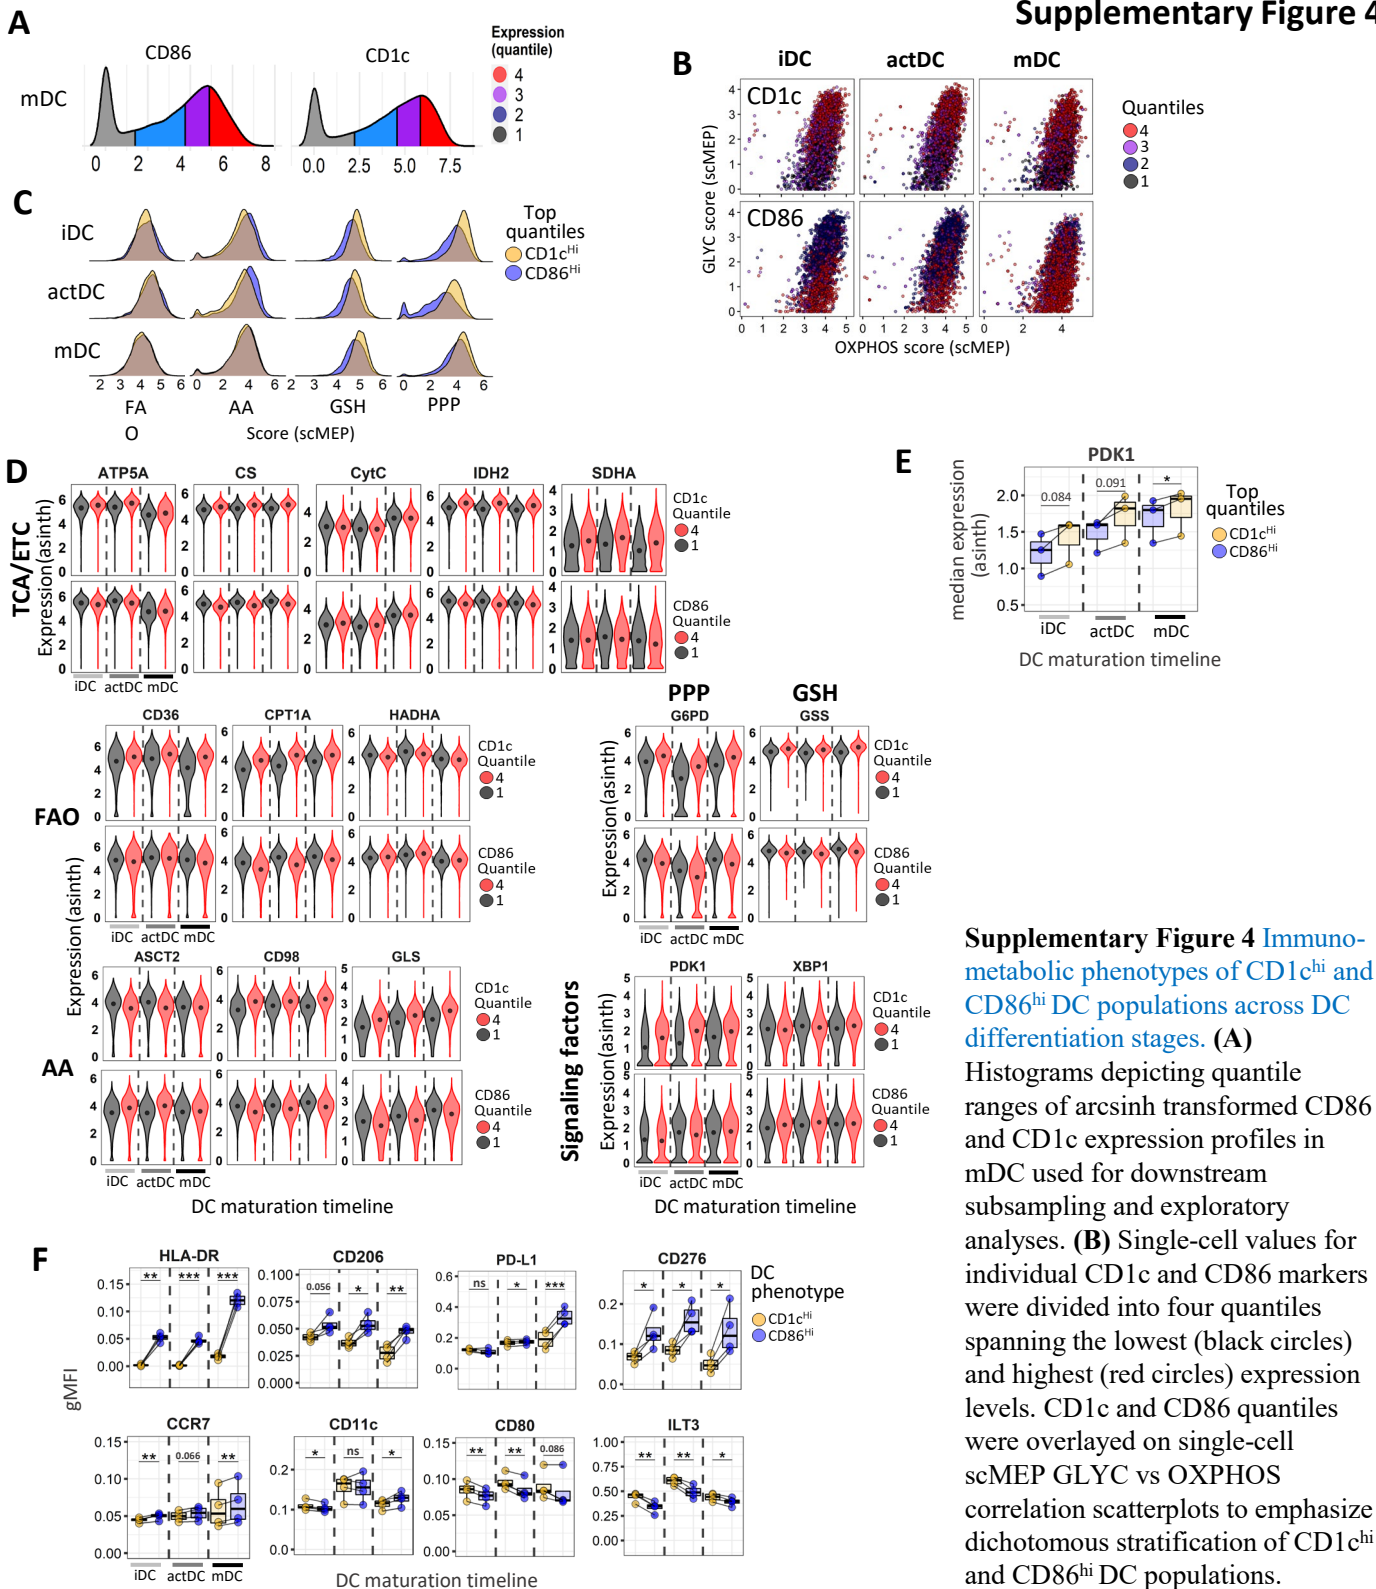

### Supplementary Figure 4 Immuno-metabolic phenotypes of CD1c<sup>hi</sup> and CD86<sup>hi</sup> DC populations across DC differentiation stages. (A)

Histograms depicting quantile ranges of arcsinh transformed CD86 and CD1c expression profiles in mDC used for downstream subsampling and exploratory analyses. (B) Single-cell values for individual CD1c and CD86 markers were divided into four quantiles spanning the lowest (black circles) and highest (red circles) expression levels. CD1c and CD86 quantiles were overlaid on single-cell scMEP GLYC vs OXPPOS correlation scatterplots to emphasize dichotomous stratification of CD1c<sup>hi</sup> and CD86<sup>hi</sup> DC populations.

(C) Shown are histogram distributions of single-cell scMEP metabolic pathway scores in CD1c<sup>hi</sup> (blue) and CD86<sup>hi</sup> (gold) DC populations. (D) Expression values of scMEP-profiled enzymes/metabolite transporters and signaling factors from indicated metabolic pathways in the 1<sup>st</sup> (lowest, black) and 4<sup>th</sup> (highest, red) quantile from CD1c and CD86 populations across iDC, actDC, and mDC. Figures (A-D) represent single cell data points from one donor (out of N = 3). (E) Shown are median expression values for PDK1 and (F) immune markers in the top 4<sup>th</sup> quantiles from CD1c<sup>hi</sup> (blue) and CD86<sup>hi</sup> (gold) DC populations across differentiation stages. (E-F) represent data points from 3 independent donors with statistical Significance calculated using one-way ANOVA with Tukey's *post-hoc* test.

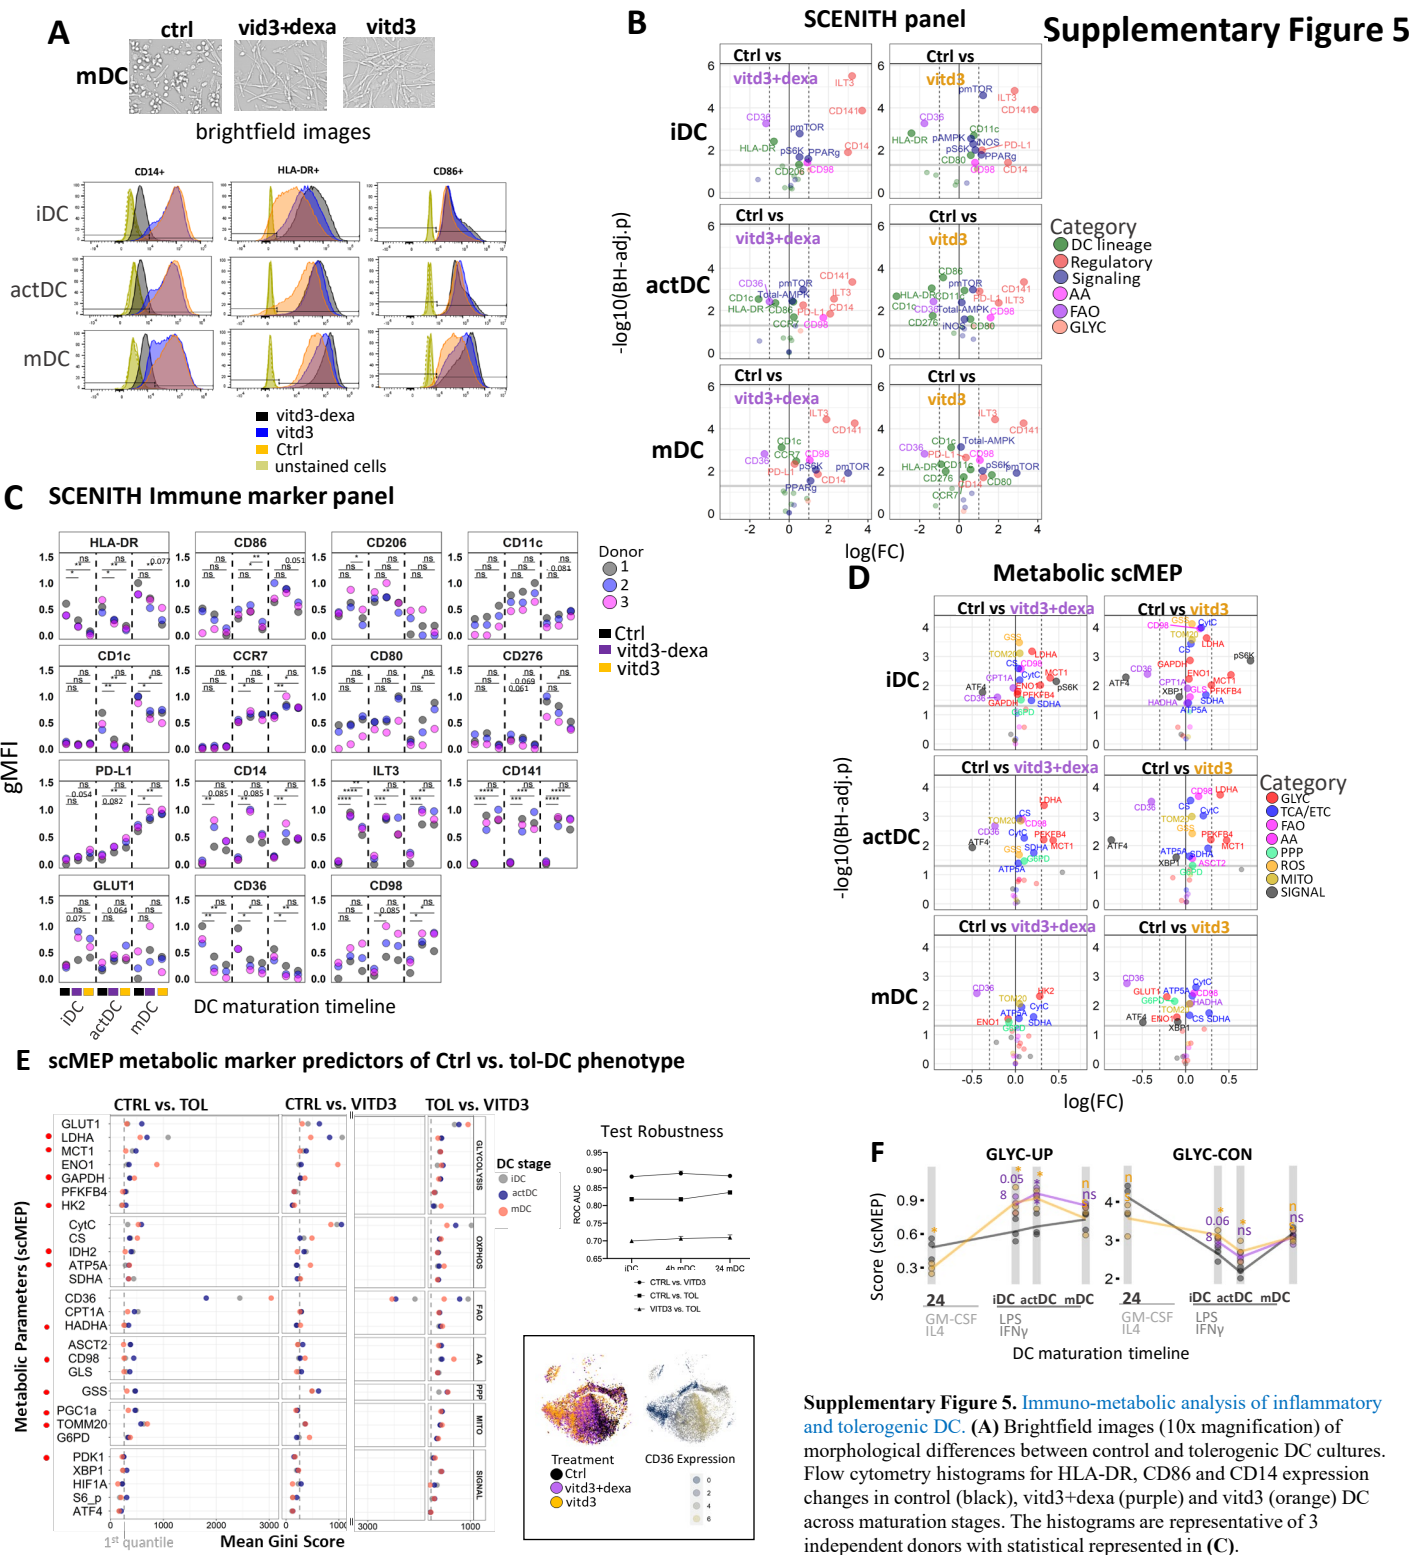

**(A)** Brightfield images (10x magnification) of morphological differences between control and tolerogenic DC cultures. Flow cytometry histograms for HLA-DR, CD86 and CD14 expression changes in control (black), vitd3+dexa (purple) and vitd3 (orange) DC across maturation stages. The histograms are representative of 3 independent donors with statistical represented in (C).

**(B)** Volcano plots show differential gMFI SCENITH marker expression by fold change ( $\log_2(\text{FC})$ ) and BH FDR adjusted p-value ( $-\log_{10}(\text{BH-adj. } p)$ ) comparing vitd3+dexa and vitd3 treated cells from controls at iDC, actDC, and mDC stages ( $N = 3$  donors). Colors represent functional categories of the profiled markers. For orientation purposes, horizontal solid lines indicate significance threshold ( $\text{BH-adj. } p = 0.05$ ) with vertical dotted lines marking fold change  $\leq 1.5$ . (C) gMFI expression values of SCENITH panel surface receptor profiles in control (black), vitd3+dexa (purple) and vitd3 (orange) treatments across maturation stages for three (color-coded) donors. Statistical Significance was calculated using one-way ANOVA with Tukey's *post-hoc* test. (D) Volcano plots show differential median scMEP marker expression by fold change ( $\log_2(\text{FC})$ ) and BH FDR adjusted p-value ( $-\log_{10}(\text{BH-adj. } p)$ ) comparing vitd3+dexa and vitd3 treated cells from controls at iDC, actDC, and mDC stages ( $N = 3$  donors). Colors indicate respective scMEP metabolic pathways. For orientation purposes, horizontal solid lines indicate significance threshold ( $\text{BH-adj. } p = 0.05$ ) with vertical dotted lines marking fold change  $\leq 1.5$ . (E) Calculated Gini impurity scores determining the relative importance of metabolic markers discriminating control and tolerogenic-treatments across DC maturation stages. Single-cell expression data were randomly divided into training and validation groups and metabolic scMEP parameters were used in the random forest model testing. Resulting area under the receiver operating characteristic curves (AUC-ROC) indicates the effectiveness of model performance. Comparative tSNE visualization of clustering similarities treatment conditions and CD36 single-cell heatmap overlays. (F) Kinetic profiles for calculated median scMEP pathways scores for control (black), vitd3+dexa (purple) and vitd3 (orange)-treated DC across DC maturation timeline. Connecting lines visualize mean pathway changes ( $N = 3$ ). Statistical significance of pairwise comparisons between control and vitd3+dexa-tol (purple asterisk) and control and vitd3-tol samples (orange asterisk) analyses are depicted.

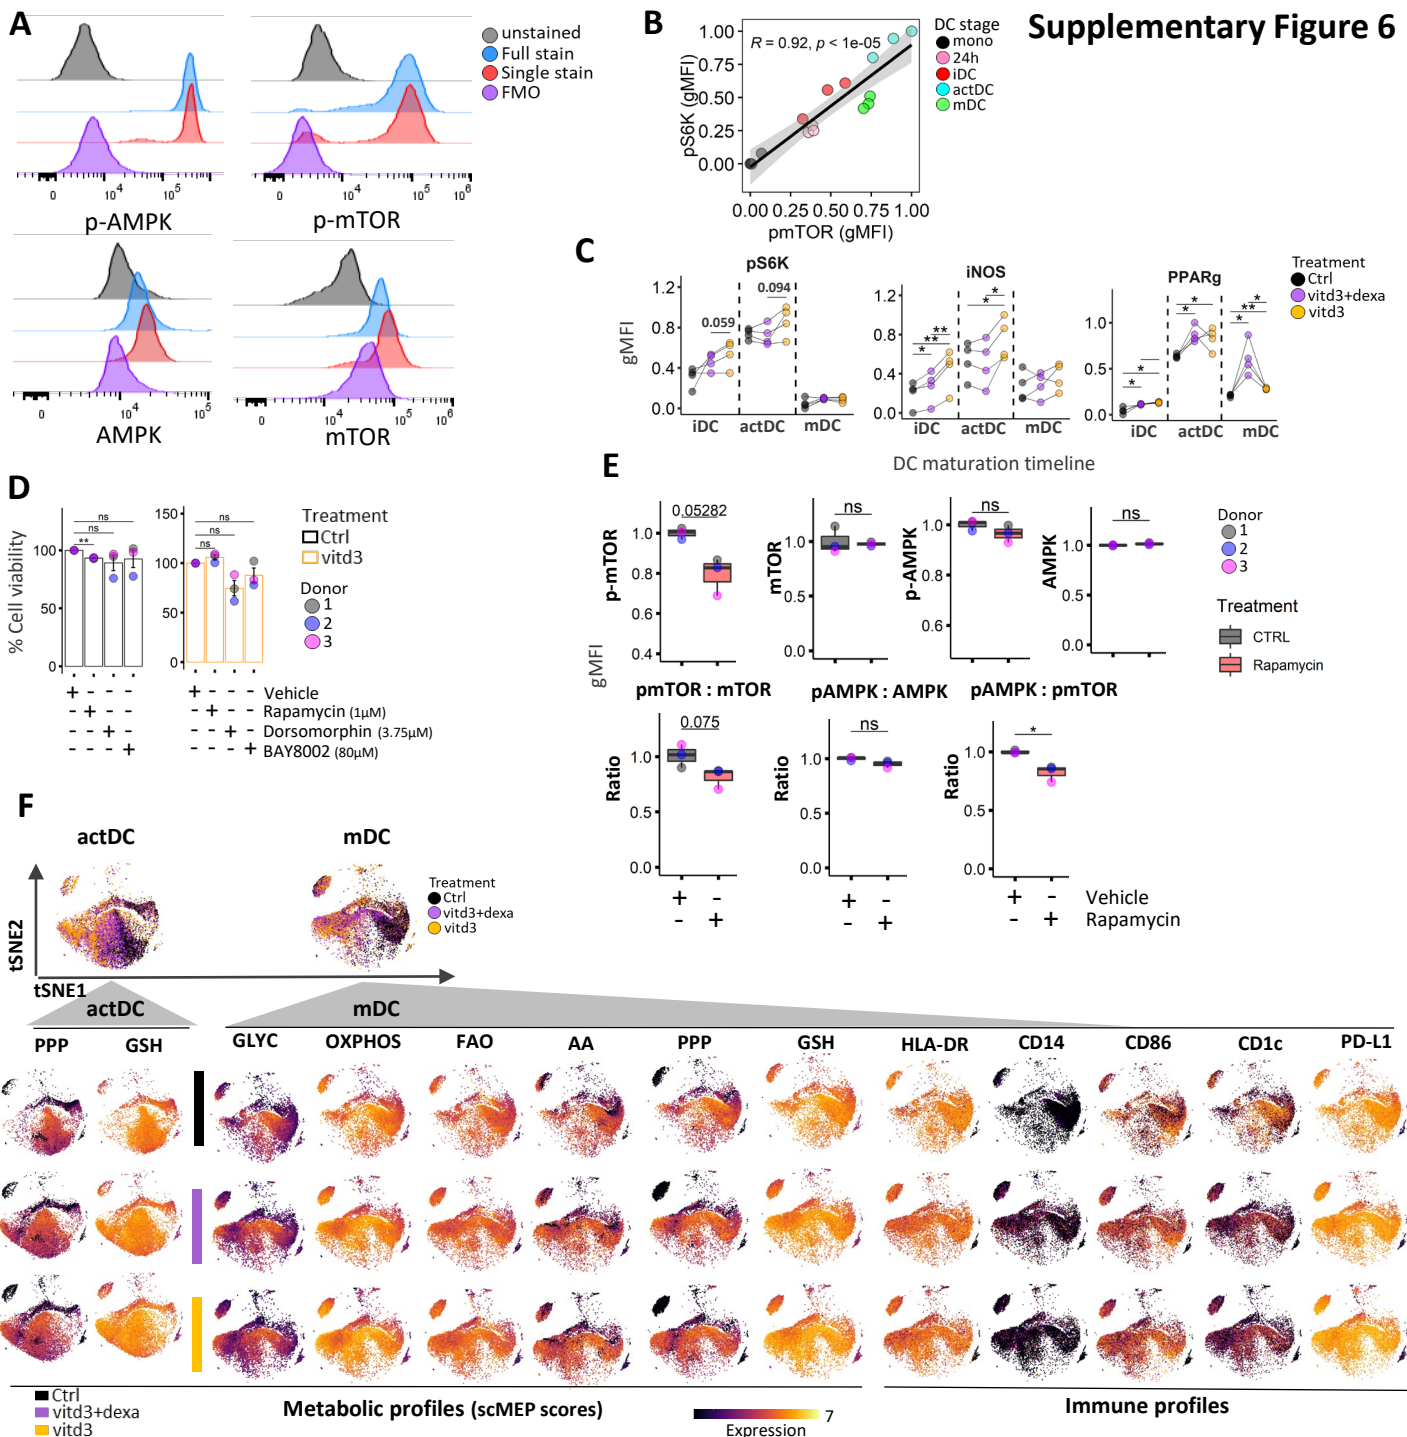

**Supplementary Figure 6. Immuno-metabolic profiling of stochastic heterogeneity in control and tolerogenic DC.** (A) Flow cytometry histograms for validation of specificity for antibodies detecting p-AMPK, total AMPK (AMPK), p-mTOR and total mTOR (mTOR) in fully-stained, single stained and fully-stained minus antibody of interest mature DC samples. Unstained controls are included for comparative purposes. (B) Correlation between gMFI of p-mTOR and pS6K across DC stages with Spearman correlation coefficient ( $R$ ) and grey shading denoting 95% confidence interval (CI) are shown ( $N = 3$  donors). (C) gMFI expression values of pS6K, iNOS and PPAR $\gamma$  in control (black), vitd3+dexa (purple) and vitd3 (orange)-treated DC across maturation stages are shown ( $N = 4$ ). Lines connect data points from an individual donor. (D) Bar graphs with mean $\pm$ SE represent % viability frequencies in of DC cultured in the presence of Vehicle (DMSO), Rapamycin (1  $\mu$ M), Dorsomorphin (3.75  $\mu$ M) and BAY8002 (80  $\mu$ M) ( $N = 3$ ). (E) box plots represent gMFI expression/phosphorylation of signaling factors and their indicated calculated ratios in Control and Rapamycin (1  $\mu$ M) samples treated with LPS/IFN $\gamma$  for 30 minutes from 3 independent donors. (F) tSNE analyses based on metabolic marker expression of control (black), vitd3+dexa (purple) and vitd3 (orange)-treated DC across 4h and 24h maturation stages from one donor (out of  $N = 3$  donors) are shown. Heatmap overlay of single-cell scMEP metabolic pathway scores and expression of phenotyping markers are depicted at actDC, and mDC stage to emphasize both immune and underlying metabolic heterogeneity as well as differences between control and tolerogenic DC. (C-E) Statistical Significance was calculated using one-way ANOVA with Tukey's *post-hoc* test.

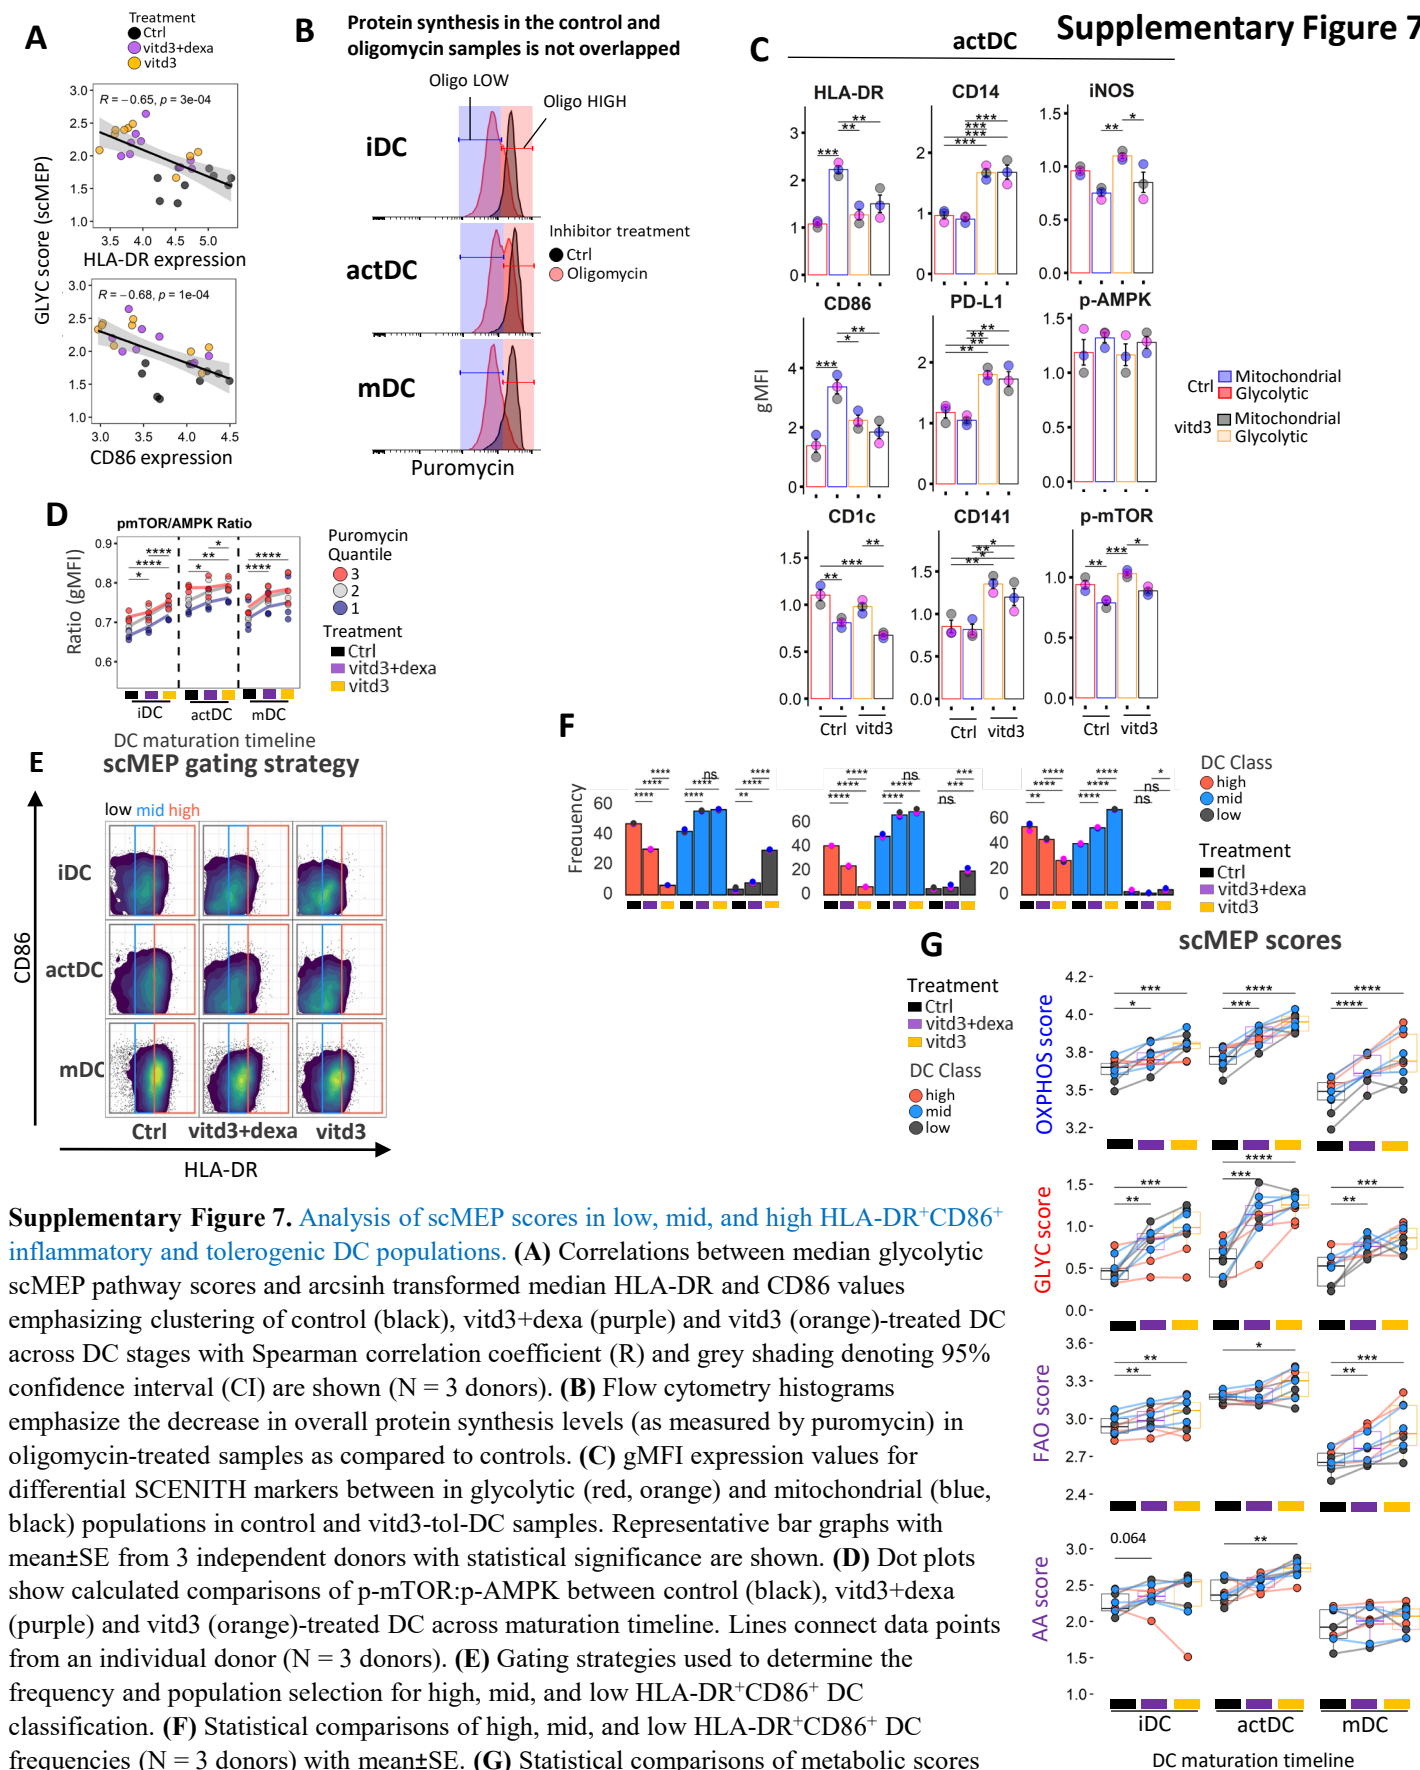

**Supplementary Figure 7. Analysis of scMEP scores in low, mid, and high HLA-DR<sup>+</sup>CD86<sup>+</sup> inflammatory and tolerogenic DC populations.** (A) Correlations between median glycolytic scMEP pathway scores and arcsinh transformed median HLA-DR and CD86 values emphasizing clustering of control (black), vitd3+dexa (purple) and vitd3 (orange)-treated DC across DC stages with Spearman correlation coefficient (R) and grey shading denoting 95% confidence interval (CI) are shown (N = 3 donors). (B) Flow cytometry histograms emphasize the decrease in overall protein synthesis levels (as measured by puromycin) in oligomycin-treated samples as compared to controls. (C) gMFI expression values for differential SCENITH markers between in glycolytic (red, orange) and mitochondrial (blue, black) populations in control and vitd3-tol-DC samples. Representative bar graphs with mean±SE from 3 independent donors with statistical significance are shown. (D) Dot plots show calculated comparisons of p-mTOR:p-AMPK between control (black), vitd3+dexa (purple) and vitd3 (orange)-treated DC across maturation timeline. Lines connect data points from an individual donor (N = 3 donors). (E) Gating strategies used to determine the frequency and population selection for high, mid, and low HLA-DR<sup>+</sup>CD86<sup>+</sup> DC classification. (F) Statistical comparisons of high, mid, and low HLA-DR<sup>+</sup>CD86<sup>+</sup> DC frequencies (N = 3 donors) with mean±SE. (G) Statistical comparisons of metabolic scores levels in HLA-DR<sup>+</sup>CD86<sup>+</sup> high, mid, and low DC populations between control and tolerogenic treatments across differentiation states (N = 3 donors). Lines connect data points from an individual donor. (C-D, F-G) Statistical Significance was calculated using one-way ANOVA with Tukey's *post-hoc* test.

**Supplementary Table 1. SCENITH panel and antibody information**

| Marker                                                       | Fluorophore       | Clone         | Host  | Company          | Catalogue #      |
|--------------------------------------------------------------|-------------------|---------------|-------|------------------|------------------|
| <b>Antibodies used in matured DC SCENITH profiling panel</b> |                   |               |       |                  |                  |
| CD14                                                         | BUV395            | MφP9          | Mouse | BD               | 563561           |
| AMPK                                                         | Dylight 350       | 2B7           | Mouse | Novus Bio        | NBP2-22127UV     |
| CD276                                                        | BUV496            | 7-517         | Mouse | BD               | 749897           |
| CD274                                                        | BUV563            | MIH1          | Mouse | BD               | 741423           |
| CD303                                                        | BUV615            | V24-785       | Mouse | BD               | 751078           |
| HLA-DR                                                       | BUV805            | G46-6         | Mouse | BD               | 748338           |
| CD1c                                                         | BV421             | L161          | Mouse | BioLegend        | 331525           |
| iNOS                                                         | eFluor 450        | CXNFT         | Rat   | eBioscience/TF   | 48-5920-80       |
| CCR7                                                         | BV480             | 3D12          | Rat   | BD               | 566170           |
| CD80                                                         | BV510             | 2D10          | Mouse | BioLegend        | 305233           |
| CD141                                                        | BV605             | M80           | Mouse | BioLegend        | 344117           |
| CD206                                                        | BV711             | 15-2          | Mouse | BioLegend        | 321135           |
| ILT-3                                                        | BV750             | ZM3.8         | Mouse | BD               | 747371           |
| CD86                                                         | BV785             | IT2.2         | Mouse | BioLegend        | 305441           |
| anti-Puromycin                                               | AF488             | 12D10         | Mouse | Millipore Sigma  | MABE343-AF488    |
| CD11c                                                        | PerCP             | BU15          | Mouse | Thermo Fisher    | A15803           |
| CD273                                                        | BB700             | MIH18         | Mouse | BD               | 746072           |
| CD36                                                         | PE                | 5-271         | Mouse | BioLegend        | 336206           |
| p-mTOR1                                                      | PE                | O21-404       | Mouse | BD               | 563489           |
| PPARg                                                        | AF594             | NA            | Rat   | Bioss Inc        | bs-4590R-A594    |
| pS6K                                                         | PE-Cy5.5          | OT1G4         | Mouse | Novus            | NBP2-73209PECY55 |
| p-mTOR1 (Ser 2448)                                           | PE-Cy7            | MRRBY         | Mouse | eBioscience/TF   | 50-112-3458      |
| CD98                                                         | PE-Vio770         | REA387        | Rat   | Mytenyi Biotec   | 130-126-200      |
| p-AMPKα-1/2 (Thr183/Thr172)                                  | AF647             | NA            | Rat   | Bioss Inc        | bs-4002R-A647    |
| Zombie NIR Fixable Viability Kit                             |                   |               |       | BioLegend        | 423105           |
| GLUT1                                                        | APC/Cy7           | not specified | Rat   | Bioss Inc        | SPC-1295D-APCCY7 |
| <b>Antibodies used in fresh PBMC SCENITH profiling panel</b> |                   |               |       |                  |                  |
| FcεRI                                                        | BUV805            | AER-37        | Mouse | BD               | 749337           |
| CD14                                                         | BV605             | 63D3          | Mouse | Biolegend        | 367125           |
| CD16                                                         | BV785             | 3G8           | Mouse | Biolegend        | 302045           |
| CD11c                                                        | PE-Cy5            | B-ly6         | Mouse | BD               | 551077           |
| CD206                                                        | BV711             | 15.2          | Mouse | Biolegend        | 321135           |
| HLA-DR                                                       | BV650             | L243          | Mouse | Biolegend        | 307649           |
| CD141 (BDCA-3)                                               | BV480             | 1A4           | Mouse | BD               | 746604           |
| CD3                                                          | IovaFluor Blue 61 | UCHT1         | Mouse | eBioscience/TF   | H002T02B05       |
| CD88                                                         | APC-Fire 750      | S5/1          | Mouse | Biolegend        | 344315           |
| CD89                                                         | APC-Fire 750      | A59           | Mouse | Biolegend        | 354115           |
| CD56                                                         | Alexa Fluor 532   | NCAM1/795     | Mouse | Novus Biological | NBP2-47826AF532  |
| CD19                                                         | V450              | HIB19         | Mouse | BD               | 560353           |
| CD123                                                        | BUV496            | 6H6           | Mouse | BD               | 751836           |
| CD45RA                                                       | BV570             | HI100         | Mouse | Biolegend        | 304132           |
| CD1c                                                         | BV421             | L161          | Mouse | Biolegend        | 331526           |

Listed are protein targets used in conjunction with SCENITH functional metabolic profiling of DC differentiation states.



**Supplementary Table 2. scMEP panel and antibody information**

| Metal | Myeloid/DC | clone         | Column2       | Group        |
|-------|------------|---------------|---------------|--------------|
| 89    | CD45       | HI30          | surface       | DC           |
| 113   | CD11c      | Bu15          | surface       | DC           |
| 115   | CD11b      | ICRF44        | surface       | DC           |
| 127   | IdU        |               | other         | DNA_RNA_PROT |
| 140   | CD3        | UCHT1         | surface       | DC           |
| 141   | CD98       | UM7F8         | surface       | AA           |
| 142   | HADHA      | EPR17940      | intracellular | FAO          |
| 143   | GSS        | EPR6563       | intracellular | ROS          |
| 144   | XBP1       | polyclonal    | intracellular | SIGNAL       |
| 145   | GLS        | polyclonal    | intracellular | AA           |
| 146   | ATF4       | EPR18111      | intracellular | SIGNAL       |
| 147   | GAPDH      | 6C5           | intracellular | GLYC         |
| 148   | CD14       | RMO52         | surface       | DC           |
| 149   | CytC       | 6H2.B4        | intracellular | ETC_TCA      |
| 150   | SDHA       | 2E3GC12FB2AE2 | intracellular | ETC_TCA      |
| 151   | Puromycin  | 12D10         | intracellular | DNA_RNA_PROT |
| 152   | ENO1       | EPR10863(B)   | intracellular | GLYC         |
| 153   | CS         | EPR8067       | intracellular | ETC_TCA      |
| 154   | BrU        | 3D4           | intracellular | DNA_RNA_PROT |
| 155   | CD163      | GHI/61        | surface       | HEME         |
| 156   | PFKFB4     | polyclonal    | intracellular | GLYC         |
| 157   | PDK1       | 2H3AA11       | intracellular | SIGNAL       |
| 158   | ATP5A      | 15H4C4        | intracellular | ETC_TCA      |
| 159   | CD86       | IT2.2         | surface       | DC           |
| 161   | TOMM20     | EPR15581-54   | intracellular | MITO         |
| 162   | G6PD       | EPR20668      | intracellular | PPP          |
| 163   | CD36       | 5-271         | surface       | FAO          |
| 164   | CD1c       | L161          | surface       | DC           |
| 165   | PGC1a      | polyclonal    | intracellular | MITO         |
| 166   | GLUT1      | EPR3915       | surface       | GLYC         |
| 167   | CD303      | 201A          | surface       | DC           |
| 168   | CD206      | 15-2          | surface       | DC           |
| 169   | LDHA       | EP1566Y       | intracellular | GLYC         |
| 170   | IDH2       | EPR7577       | intracellular | ETC_TCA      |
| 171   | HK2        | 3D3           | intracellular | GLYC         |
| 172   | MCT1       | P14612        | surface       | GLYC         |
| 173   | CPT1A      | 8F6AE9        | intracellular | FAO          |
| 174   | ASCT2      | CAL33         | surface       | AA           |
| 175   | PDL1       | 29E.2A3       | surface       | DC           |
| 176   | HIF1A      | EP1215Y       | intracellular | SIGNAL       |
| 196   | S6_p       | A17020B       | intracellular | SIGNAL       |
| 198   | dead       |               |               |              |
| 209   | HLA-DR     | L243          | surface       | DC           |

Listed are metal conjugates and protein targets used in scMEP profiling.
